# Supplementary material for: Nutrikinetics and urinary excretion of phenolic compounds after a 16-week supplementation with a flavanone-rich ingredient
Source: Royal Society of Chemistry journal article supplement (doi:10.1039/d3fo02820h), 2023-01-01
Supplement: d3fo02820h1.xlsx [file d3fo02820h1.xlsx]

## Sheet: List
	List of Supplementary Information and Tables
	Supplementation information1 : Method on detailed characterization of the supplement; Chemicals and Reagents
	Supplementary Information 2: Restriction of diet before the days of sample collection
	Supplementary Table 1: Chromatographic and spectral characteristics, standard compounds used for the quantification and quantification of the identified compounds in flavanone-rich ingredient (n = 3). RT: retention time.
	Supplementary Table 2: Safety parameters of the two treated groups.Data are expressed as mean ± SEM (n=10 for low dose, n=9 for high dose)
	Supplementary Table 3: Chromatographic and spectral characteristics of the quantified metabolites and catabolites after flavanone-rich ingredient consumption. RT: retention time. HMG means 3-hydroxy-3-methylglutaryl-glycosides. CE: collision energy.
	Supplementary Table 4: 24-h circulating caffeine metabolites from Sinetrol Xpur
	Supplementary Table 5: 48-h cumulative excretion of caffeine metabolites from Sinetrol Xpur

## Sheet: Supplementary Information 1
Supplementation information: Method on detailed characterization of the supplement
An amount of 100 mg of flavanone-rich powder were added with 1 mL of dimethyl sulfoxide / methanol / formic acid (50/49.9/0.1 v/v/v). Samples were vortexed for 1 min and sonicated for 25 min, vortexed again for 1 min and finally centrifuged at 12,000 rpm for 10 min at room temperature. The supernatants were collected and the residual pellets were re-extracted twice using 0.5 mL of the same solven…
Supplemental information: Chemicals and Reagents
Naringenin, naringenin-7-O-rutinoside (narirutin), naringin (naringenin 7-neohesperidoside), hesperetin-7-O-rutinoside (hesperidin), hesperetin, isosakuranetin-O-rutinoside (didymin), quercetin, (+)-catechin, (−)-epicatechin, 5-caffeoylquinic acid, 3,4-dihydroxybenzoic acid (aka protocatechuic acid), salicylic acid 2-O-glucoside, 2-Hydroxy-2-(3′-hydroxyphenyl)acetic acid (aka 3-hydroxymandelic ac…

## Sheet: Supplementary Information 2
	Supplementary Information 2: Restriction of diet before the days of sample collection
	During the bioavailability/pharmacokinetics assessment (W1 and W16), participants are asked to:
	· Abstain from forbidden foods in the list below
	· Abstain from physical exercise for 4 days before the beginning of the study and throughout the course of the pharmacokinetics/bioavailability study (W1 and W16).
	FORBIDDEN FOODS
	Coffee and foods or beverages containing caffeine (coffee, coca-cola, redbull…)
	Cocoa and chocolate and sweet products containing cocoa or chocolate (as biscuits, ice-cream, pies, yogurt, beverages, snacks…)
	Tea and foods or beverages containing tea
	Citrus fruits: lemons (yellow and green), oranges (bitter and sweet), grapefruits, clementines, tangerines, bergamot and all other forms of citrus fruits
	Citrus juices (orange juice, lemon juice, grapefruit juice, clemntine juice, tangerine juice, bergamot juice…)
	Any foods.or other beverages containing citrus: citrus yoghourts, citrus cakes, citrus jam, citrus marmelade, citrus jellies, citrus ice…
	Guarana and beverages containing guarana
	Throughout the course of study, volunteers were instructed by a dietician to consume a normo-caloric and balanced diet corresponding to their individual needs according to their individual Basal Metabolic Rate (BMR) calculated from the revised equation of Harris-Benedict and adjusted according to their individual level of physical activity.

## Sheet: Supplementary Table 1
Supplementary Table 1: Chromatographic and spectral characteristics of the quantified metabolites and catabolites after flavanone-rich ingredient consumption. RT: retention time. HMG means 3-hydroxy-3-methylglutaryl-glycosides. CE: collision energy. * Compounds were detected in positive ionization mode
Compound		RT (min)	Parent ion (m/z)	Quantifier ion (m/z)	CE (V)	Qualifier Ion (m/z)	CE (V)	Qualifier Ion (m/z)	CE (V)	S-Lens
Previous names	Metabolite nomenclature based on Kay et al., 2020
Naringenin (5-, 7-, or 4′)-sulfate	Naringenin (5-, 7-, or 4′)-sulfate	7.97 and 8.22	351	271	26	151	34			100
Naringenin-7-glucuronide	Naringenin-7-glucuronide	5.65
Naringenin-4′-glucuronide	Naringenin-4′-glucuronide	5.72	447	271	25	151	39	175	16	84
Naringenin (5-, 7-, or 4′)-diglucuronide	Naringenin (5-, 7-, or 4′)-diglucuronide	4.89 and 5.53	623	447	25	271	26	175	25	100
Naringenin (5-, 7-, or 4′)-sulfo-glucuronide	Naringenin (5-, 7-, or 4′)-sulfo-glucuronide	5.74	527	447	26	351	25	271	25	115
Isosakuranetin (5-, or 7)-sulfate	Isosakuranetin (5-, or 7)-sulfate	7.84	365	285	20	270	20			90
Isosakuranetin (5-, or 7)-glucuronide	Isosakuranetin (5-, or 7)-glucuronide	6.57	461	285	35	113	18			115
Eriodictyol (5-, 7-, 3′-, or 4′)-sulfate	Eriodictyol (5-, 7-, 3′-, or 4′)-sulfate	5.82	367	287	20	151	39			90
Hesperetin (5-, 7-, or 3′)-sulfate	Hesperetin (5-, 7-, or 3′)-sulfate	7.32	381	301	24	151	24	286	35	84
Hesperetin-7-glucuronide	Hesperetin-7-glucuronide	5.67	477	301	27	151	46	113	27
Hesperetin-3′-glucuronide	Hesperetin-3′-glucuronide	5.9	477	301	27	151	46	113	27	115
Hesperetin (5-, 7-, or 3′)-sulfo-glucuronide	Hesperetin (5-, 7-, or 3′)-sulfo-glucuronide	5.92	557	477	26	381	26	301	27	115
Ferulic 4′-sulfate	3′-Methoxycinnamic acid-4′-sulfate	4.7	273	193	18	134	33			92
Isoferulic 3′-sulfate	4′-Methoxycinnamic acid-3′-sulfate	5.06	273	193	18	178	28			92
Isoferulic acid 3′-glucuronide	4′-Methoxycinnamic acid-3′-glucuronide	4.4	369	193	18	178	32	134	39	93
3-(3′-methoxyphenyl)propionic acid-4′-sulfate	3-(3′-methoxyphenyl)propanoic acid-4′-sulfate	4.31	275	195	31	136	17			75
3-(4′-methoxyphenyl)propionic acid-3′-sulfate	3-(4′-methoxyphenyl)propanoic acid-3′-sulfate	4.73	275	195	31	136	17			75
3-(3′-methoxyphenyl)propionic acid-4′-glucuronide	3-(3′-methoxyphenyl)propanoic acid-4′-glucuronide	3.22	371	195	26	136	37	113	21	90
3-(4′-methoxyphenyl)propionic acid-3′-glucuronide	3-(4′-methoxyphenyl)propanoic acid-3′-glucuronide	4.25	371	195	26	136	37	113	21	90
Caffeic acid-sulfate	Hydroxycinnamic acid-sulfate	4.44	259	179	20	135	25			62
3-(3′-hydroxyphenyl)propionic acid-4′-sulfate	3-(3′-Hydroxyphenyl)propanoic acid-4′-sulfate	2.67	261	181	20	137	25			96
3-(4′-hydroxyphenyl)propionic acid-3′-sulfate	3-(4′-Hydroxyphenyl)propanoic acid-3′-sulfate	3.71	261	181	20	137	25			96
3′-hydroxyphenylacetic acid-4′-sulfate or 4′-hydroxyphenylacetic acid-3′-sulfate	Hydroxyphenylacetic acid-sulfate	4.70	247	167	17	123	17			74
3′-hydroxyphenylacetic acid-4′-glucuronide or 4′-hydroxyphenylacetic acid-3′-glucuronide	Hydroxyphenylacetic acid-glucuronide	1.45	343	167	23	113	18			92
3-hydroxybenzoic acid-4-sulfate and 4-hydroxybenzoic acid-3-sulfate (coelution)	Hydroxybenzoic acid-sulfate (Coelution of 3-Hydroxybenzoic acid-4-sulfate and 4-Hydroxybenzoic acid-3-sulfate)	1.95	233	109	33	153	19			77
3′-hydroxybenzoic acid-4′-glucuronide	3-Hydroxybenzoic acid-4-glucuronide	0.75	329	153	22	113	18			109
4′-hydroxybenzoic acid-3′-glucuronide	4-Hydroxybenzoic acid-3-glucuronide	0.99	329	153	22	113	18			109
3′-methoxyphenylacetic acid-4′-glucuronide or 4′-methoxyphenylacetic acid-3′-glucuronide	Methoxyphenylacetic acid-glucuronide	1.4	357	181	21	113	22	166	30	63
3-methoxybenzoic acid-4-sulfate	3-Methoxybenzoic acid-4-sulfate	2.54	247	167	17	152	27	108	35	74
4-methoxybenzoic acid-3-sulfate	4-Methoxybenzoic acid-3-sulfate	3.15	247	167	17	152	27	108	35	74
3-methoxybenzoic acid-4-glucuronide	3-Methoxybenzoic acid-4-glucuronide	0.95	343	167	23	108	42	152	40	92
4-methoxybenzoic acid-3-glucuronide	4-Methoxybenzoic acid-3-glucuronide	1.63	343	167	23	108	42	152	40	92
3-(phenyl)hydracrylic acid-sulfate	3-Hydroxy-3-(phenyl)propanoic acid-3′-sulfate	2.3	261	181	20	121	10			96
Coumaric acid-4′-sulfate	Cinnamic acid-4′-sulfate	4.54	243	163	17	119	38			84
Coumaric acid-3′-sulfate	Cinnamic acid-3′-sulfate	4.97	243	163	17	119	38			84
3-(phenyl)propionic acid-4′-sulfate	3-(Phenyl)propanoic acid-4′-sulfate	5.44	245	165	20	121	15			90
3-(phenyl)propionic acid-3′-sulfate	3-(Phenyl)propanoic acid-3′-sulfate	6.05	245	165	20	121	15			90
3-(phenyl)propionic acid-4′-glucuronide or 3-(phenyl)propionic acid-3′-glucuronide	3-(Phenyl)propanoic acid-glucuronide	1.6	341	165	20	121	15	113	18	90
Phenylacetic acid-4′-sulfate	Phenylacetic acid-4′-sulfate	3.69	231	151	20	107	10			75
Phenylacetic acid-3′-sulfate	Phenylacetic acid-3′-sulfate	4.76	231	151	20	107	10			75
Phenylacetic acid-4′-glucuronide or Phenylacetic acid-3′-glucuronide	Phenylacetic acid-glucuronide	4.31	327	151	27	113	15	107	10	78
Benzoic acid-4′-sulfate	Benzoic acid-4-sulfate	1.86	217	137	20	93	16			70
4-Hydroxyhippuric acid	4′-Hydroxyhippuric acid	1.04	194	100	11	150	15	93	21	72
3-Hydroxyhippuric acid	3′-Hydroxyhippuric acid	1.36	194	150	15	100	11			72
Hippuric acid	Hippuric acid	2.26	178	134	15	77	22			61
Phloroglucinol-sulfate	Dihydroxybenzene-sulfate	0.96	205	125	20	81	20			68
Methoxyphloroglucinol-sulfate	Methoxyhydroxybenzene-sulfate	1.36	219	124	24	139	20			68
Resorcinol-sulfate	Hydroxybenzene-sulfate	2.26	189	109	20	189	81	20		70
Resorcinol-glucuronide	Hydroxybenzene-glucuronide	1.71	285	109	27	113	15			78
Methoxyresorcinol-sulfate	Methoxybenzene-sulfate	4.76	203	108	26	123	20			70
4′-Methoxy-3′-hydroxymandelic acid or 3′-Methoxy-4′-hydroxymandelic acid	2-Hydroxy-2-(-hydroxy-methoxyphenyl)acetic acid	5.17	197	137	17	153	17	182	18	70
Mandelic acid-4′-sulfate or Mandelic acid-3′-sulfate	2-Hydroxy-2-(phenyl)acetic acid-3′-sulfate	3.75	247	167	17					74
Caffeine*		2.98	195	138	23	42	40	110	27	103
Theophylline		1.34	181	124	22					101
(1,3-Dimethylxanthine)*
Paraxanthine*		1.34	181	163	5	85	20	124	22	101
(1,7-Dimethylxanthine)
(3,7-Dimethylxanthine)*
1-Methylxanthine		0.8	167	110	24					48
1,3-Dimethyluric		0.9	195	180	11					108
1,7-Dimethyluric		1.1	195	114	16	115	15			108
3,7-Dimethyluric		1.1	195	114	16	115	15			108

## Sheet: Supplementary Table 2
	Supplementary Table 2: Safety parameters of the two dosage groups. Data expressed in mean ± SD
		Week 1		Week 16
		Dose 1	Dose 2	Dose 1	Dose 2
	Erythrocytes (4.5-6.5 x10E6/mmc)	4.9 ± 0.3	5.2 ± 0.5	4.7 ± 0.4	5 ± 0.5
	Hemoglobin (14-18 gr/100)	14.4 ± 1.1	14.8 ± 1.2	13.6 ± 1.3	14.4 ± 1.3
	Hematocrit (42-53 %)	43.1 ± 2.5	43.9 ± 3.2	40.9 ± 3.2	42.5 ± 3.4
	VGM (80-100 fl)	87.5 ± 2	85 ± 4.9	87.1 ± 2.5	84.6 ± 5.1
	MCH (26-32 pg)	29.2 ± 1.3	28.7 ± 1.6	28.9 ± 1.3	28.5 ± 1.6
	CCMH (31-37 g/100)	33.4 ± 1	33.7 ± 0.7	33.1 ± 1	33.7 ± 0.7
	IDR (<14.5 )	12.8 ± 0.8	12.6 ± 0.4	13.2 ± 0.7	12.8 ± 0.6
	Leucocytes (4-10.8 x10E3/mmc)	6.5 ± 1.1	6.1 ± 1.7	6.6 ± 1.1	6.4 ± 1.3
	Lymphocytes (25-50 %)	35.1 ± 6.2	33.4 ± 5.4	36.3 ± 5.2	36.6 ± 6
	Lymphocytes2 (1.2-4 x10E3/mmc)	2.3 ± 0.7	2 ± 0.5	2.4 ± 0.6	2.3 ± 0.6
	Monocytes (2-10 %)	5.7 ± 1.2	7.5 ± 2.2	6.4 ± 1	7.8 ± 1.1
	Monocytes3 (0.1-1 x10E3/mmc)	0.4 ± 0.1	0.4 ± 0.1	0.4 ± 0.1	0.5 ± 0.1
	Eosinophiles % (0-5 %)	3.3 ± 3.3	2.7 ± 1.7	4.4 ± 2.9	3.9 ± 2.6
	Eosinophiles (0-0.4 x10E3/mmc)	0.2 ± 0.2	0.2 ± 0.2	0.3 ± 0.2	0.3 ± 0.2
	Basophiles % (0-2 %)	0.4 ± 0.3	0.3 ± 0.2	0.3 ± 0.1	0.3 ± 0.3
	Basophiles (0-0.2 x10E3/mmc)	0 ± 0	0 ± 0	0 ± 0	0 ± 0
	Neutrophiles % (40-80 %)	55.5 ± 6.8	56.1 ± 5.5	52.7 ± 5.7	51.4 ± 7.8
	Neutrophiles (1.4-6.5 x10E3/mmc)	3.6 ± 0.6	3.5 ± 1.2	3.4 ± 0.5	3.3 ± 0.8
	Plaquettes (150-400 x10E3/mmc)	255.1 ± 48.3	252.1 ± 36.9	235.3 ± 49.4	245 ± 39.8
	VMP (7-14 µm3)	12.3 ± 1	11.5 ± 0.9	12 ± 0.8	11.7 ± 0.7
	Kidney function
	Urea (10-50 mg/dL)	25.4±7.2	27.3±8.3	29.1±7	27.2±4.8
	Creatinine (<1.1 mg/dL)	0.9±0.2	0.9±0.1	0.8±0.2	0.8±0.2
	Sodium (135-148 mEq/L)	140.5±1.6	140.3±1.6	137.7±2	138.8±1.7
	Potassium (3.5-5.5 mEq/L)	4.9±0.3	5±0.4	4.7±0.2	4.9±0.9
	Liver function
	ASAT (< 38 UI/L)	26.3±14	20.5±6.5	23.7±12.2	18.2±4.2
	ALAT (<40 UI/L)	30±16.9	25.6±18	23.2±11	15.2±9.2
	GGT (10-47 UI/L)	45.3±57.3	19.2±7.6	48.9±61.9	17.9±6.8
	Cardiac function
	Heart rate (60-100 bpm)	72.8±11.2	63.2±13.8	77.3±12.2	68.8±22

## Sheet: Supplementary Table 3
Supplementary Table 3: Chromatographic and spectral characteristics of the quantified metabolites and catabolites after flavanone-rich ingredient consumption. RT: retention time. HMG means 3-hydroxy-3-methylglutaryl-glycosides. CE: collision energy.
Compound	RT (min)	[M-H]-	MS2	MS3	STD USED FOR QUANTIFICATION	Mean (mg/ 900 mg) ±SD
Flavanones
Naringenin derivative	4.48	433	271	177, 151	Narirutin	0.054 ± 0
Eriocitrin	5.17	595	475, 287, 431		Narirutin	0.18 ± 0.01
Neoeriocitrin	5.32	595	459, 287	441, 357, 235, 271	Narirutin	0.801 ± 0.02
Hesperetin-7-O-neohesperidoside-6”-O-HMG (Brutieridin)	5.36	753	579	459, 271, 313, 235	Isosakuranetin-7-O-rutinoside (Didymin)	0.333 ± 0.02
Naringenin-C-dihexoside	5.41	595	475	271, 151, 177	Narirutin	1.008 ± 0.01
Naringenin-7-O-rutinoside (Narirutin)	5.72	579	271		Narirutin	5.589 ± 0.18
Naringenin-7-O-glucoside-6”-O-HMG	5.75	577	271		Narirutin	0.18 ± 0
Naringenin-7-O-neohesperidoside (Naringin)	5.91	579	459, 271, 235		Narirutin	213.669 ± 10.05
Diosmetin	5.96	299			Hesperetin	0.207 ± 0.01
Naringenin-O-glucoside	5.98	433	271		Narirutin	0.045 ± 0.01
Hesperetin-7-O-rutinoside (Hesperidin)	6.06	609	301	286, 283, 257, 242, 125	Hesperidin	100.017 ± 3.11
Naringenin derivative	6.12	433	301		Narirutin	0.045 ± 0
Hesperetin-7-O-neohesperidoside (Neohesperidin)	6.24	609	301	286, 283, 257, 242, 125	Neohesperidin	0.99 ± 0.03
Tetrahydroxy-dimethoxyflavone-O-hexoside (Syringetin-O-hexoside)	6.3	507	492	329	Hesperidin	0.666 ± 0.03
Hesperetin-O-glucuronide	6.31	477	315	300, 301, 287, 151	Hesperidin	0.864 ± 0.05
Hesperetin-O-hexoside	6.36	463	301		Hesperidin	0.207 ± 0.03
Isonaringenin-7-O-neohesperidoside (Isonaringin)	6.44	579	459, 271, 235		Narirutin	1.161 ± 0.01
Naringenin-7-O-neohesperidoside-6”-O-HMG (Melitidin)	6.47	723	579, 621, 661	459, 271, 313	Narirutin	0.711 ± 0.01
Tetrahydroxyflavanone-O-rhamnoside	6.93	433	269287259301		Narirutin	0.666 ± 0.03
Eriodyctiol	7.18	287	151		Naringenin	0.018 ± 0
Isosakuranetin-O-rutinoside (Didymin)	7.2	593	285	270, 243, 241, 164	Isosakuranetin-7-O-rutinoside (Didymin)	2.133 ± 0.01
7-O-neohesperidoside of isosakuranetin (Poncirin)	7.37	593	285	270, 243, 241, 164	Isosakuranetin-7-O-rutinoside (Didymin)	3.348 ± 0.77
Naringenin	8.11	271	151, 177		Naringenin	1.071 ± 0.03
Sinensetin*	8.35	371	254, 241, 210, 201, 327		Hesperetin	0.153 ± 0.01
Hesperetin	8.52	301	286, 242		Hesperetin	0.486 ± 0.03
Isosinensetin*	8.54	371	254, 241, 210, 201, 327		Hesperetin	0.144 ± 0.01
Tangeretin*	9.02	371			Hesperetin	0.027 ± 0
Tangeretin*	9.55	371			Hesperetin	0.018 ± 0
TOTAL FLAVANONES (mg/900mg)						334.791
Gallic hexoside	1.15	331	169		Salicylic Acid 2-O-beta-D-Glucoside	0.135 ± 0.02
Protocatechuic glucoside	1.46	315	153		Salicylic Acid 2-O-beta-D-Glucoside	0.018 ± 0
Hydroxymandelic acid	2.51	167	123139149		3-Hydroxymandelic acid	0.252 ± 0.01
Caffeic acid hexoside	3.46	341	179		Salicylic Acid 2-O-beta-D-Glucoside	0 ± 0
(+)-Catechin	3.84	289			Catechin	0 ± 0
Hydroxyphenyllactic acid	3.89	181	163, 137, 109		p-hydroxyphenyllactic acid	0.261 ± 0.02
4-Caffeoylquinic acid	3.95	353			5-Caffeoylquinic acid	0.027 ± 0
Dihydroxybenzoic acid	3.97	153			Protocatechuic acid	0.351 ± 0.04
(-)-Epicatechin	4.39	289			Epicatechin	0 ± 0
Unknown	5.31	431	311	283	Narirutin	0.081 ± 0.01
Apigenin	8.16	269	225, 149		Quercetin	0.207 ± 0.01
Unknown	10.08	471			Hesperidin	0.396 ± 0.02
Unknown	10.23	471	325, 307, 351, 427, 369		Hesperidin	0.648 ± 0.01
TOTAL (POLY)PHENOL COMPOUNDS (mg/900mg)						337.167

## Sheet: Supplementary Table 4 & 5
	Supplementary Table 4: 24-h circulating caffeine metabolites from Sinetrol Xpur
			WEEK 1			WEEK 16			WEEK 1			WEEK 16
		PK Parameters	LOW DOSE			LOW DOSE			HIGH DOSE			HIGH DOSE
			mean		SEM	mean		SEM	mean		SEM	mean		SEM
	Caffeine	Cmax (nmol/L)	2238.5	±	347.8	2801.9	±	241.6	3331.9	±	504.4	5484	±	413.1
		Tmax (h)	5.7	±	0.9	4.3	±	0.8	7.1	±	0.7	6.7	±	0.2
		AUC 0-24 (nmol*h/L)	21224.5	±	4001.5	25942.9	±	2331.5	35715.7	±	6377.3	53782.5	±	9130.7
		Cavg (nmol/L)	884.4	±	166.7	1081	±	97.1	1488.2	±	265.7	2240.9	±	380.4
	Paraxanthine	Cmax (nmol/L)	859	±	57.8	1175	±	138.4	1374.5	±	205.5	2208.8	±	156.3
		Tmax (h)	7.4	±	0.6	7	±	0.8	12.8	±	2	9.4	±	1.8
		AUC 0-24 (nmol*h/L)	12105	±	1339.8	17901	±	2286.8	18882.7	±	3151	30098.1	±	5206.9
		Cavg (nmol/L)	504.4	±	55.8	745.9	±	95.3	786.8	±	131.3	1254.1	±	217
	1-Methylxanthine	Cmax (nmol/L)	7.1	±	0.9	10.6	±	1.8	10.9	±	1.9	14.3	±	1.9
		Tmax (h)	9.4	±	1.8	5.1	±	0.9	10.2	±	1.8	7.4	±	0.7
		AUC 0-24 (nmol*h/L)	77.5	±	8.9	119.6	±	24	134	±	21	148.4	±	23.7
		Cavg (nmol/L)	3.2	±	0.4	5	±	1	5.6	±	0.9	6.2	±	1
	1,7-Dimethyluric acid	Cmax (nmol/L)	26.7	±	3.5	43	±	7.9	35.3	±	5.5	61.3	±	5.6
		Tmax (h)	7.7	±	0.6	6.8	±	0.1	11	±	2.4	7.9	±	2
		AUC 0-24 (nmol*h/L)	339.8	±	54.9	585.2	±	100.7	435	±	83.2	774.1	±	93.6
		Cavg (nmol/L)	14.2	±	2.3	24.4	±	4.2	18.1	±	3.5	32.3	±	3.9
	Supplementary Table 5: 48-h cumulative excretion of caffeine metabolites from Sinetrol Xpur
		WEEK 1			WEEK 16			WEEK 1			WEEK 16
		LOW DOSE			LOW DOSE			HIGH DOSE			HIGH DOSE
	Caffeine	303.151	±	47.7003	212.397	±	55.2633	530.06	±	84.8168	508.15	±	148.772
	Paraxanthine	1734.93	±	256.069	1899.59	±	492.36	2546.32	±	485.578	3245.56	±	501.566
	1-Methylxanthine	6248.39	±	1016.95	8391.1	±	1667.15	10970.5	±	2147.64	10371.6	±	1096.73
	1,7-Dimethyluric acid	3177.79	±	859.291	4380.36	±	1551.42	3446.07	±	656.191	6110.09	±	1344.46
	1,3-Dimethyluric acid	738.495	±	141.804	755.495	±	152.662	892.804	±	126.118	1100.48	±	206.555
